# Supplementary material for: Determinants of Survival and Post-Progression Outcomes by Sorafenib–Regorafenib Sequencing for Unresectable Hepatocellular Carcinoma
Source: MDPI journal article supplement (doi:10.3390/cancers14082014), 2022-04-15
Supplement: s1 [file s1]

**Table S1.** Best radiologic response to regorafenib therapy by RECIST v1.1 criteria

| <b>Radiologic response*</b>                            | <b>CR</b> | <b>PR</b> | <b>SD</b>  | <b>PD</b>  | <b>ORR</b> | <b>DCR</b> |
|--------------------------------------------------------|-----------|-----------|------------|------------|------------|------------|
| Regorafenib monotherapy<br>(n=69)                      | 1 (1.4%)  | 5 (7.2%)  | 21 (30.4%) | 42 (60.9%) | 6 (8.6%)   | 27 (39.1%) |
| <b>Concurrent loco-regional therapy</b>                |           |           |            |            |            |            |
| Yes (n=16)                                             | 1 (6.2%)  | 0 (0%)    | 8 (50%)    | 7 (43.8%)  | 1 (6.2%)   | 9 (56.2%)  |
| No (n=87)                                              | 2 (2.3%)  | 8 (9.2%)  | 26 (29.9%) | 51 (58.6%) | 10 (11.5%) | 36 (41.4%) |
| P value                                                |           |           |            | 0.512      | 1.000      | 0.408      |
| <b>Concurrent immune checkpoint inhibitors therapy</b> |           |           |            |            |            |            |
| Yes (n=19)                                             | 1 (5.3%)  | 3 (15.8%) | 5 (26.3%)  | 10 (52.6%) | 4 (21.1%)  | 9 (47.4%)  |
| No (n=84)                                              | 2 (2.4%)  | 5 (6%)    | 29 (34.5%) | 48 (57.1%) | 7 (8.3%)   | 36 (42.9%) |
| P value                                                |           |           |            | 0.299      | 0.116      | 0.919      |

\*Evaluation of best radiologic response to regorafenib was available in 103 (95.4%) patients.

CR, complete response; PR, partial response; SD, stable disease; PD, progressive disease; ORR, objective response rate; DCR, disease control rate.

**Table S2.** Univariate and multivariate analyses of factors associated with progression-free survival

|                                                 |                 | Univariate          |       | Multivariate        |       | Multivariate |    |
|-------------------------------------------------|-----------------|---------------------|-------|---------------------|-------|--------------|----|
|                                                 |                 |                     |       | Model I†            |       | Model II†    |    |
|                                                 |                 | HR (95% CI)         | P     | HR (95% CI)         | P     | HR (95% CI)  | P  |
| <b>Baseline factors</b>                         |                 |                     |       |                     |       |              |    |
| Age                                             | >60/≤60         | 0.906 (0.555-1.478) | 0.693 |                     |       |              |    |
| Sex                                             | Male/<br>Female | 0.850 (0.458-1.576) | 0.606 |                     |       |              |    |
| HBsAg-positive                                  | Yes/No          | 1.599 (1.001-2.555) | 0.049 |                     | NS    |              | NS |
| Anti-HCV-positive                               | Yes/No          | 1.044 (0.594-1.837) | 0.881 |                     |       |              |    |
| Time to progression on prior sorafenib (months) | >4/≤4           | 0.475 (0.299-0.755) | 0.002 | 0.485 (0.302-0.781) | 0.003 |              | NS |
| Achieving disease control by sorafenib          | Yes/No          | 0.633 (0.396-1.012) | 0.056 |                     | NS    |              | NS |

|                                 |        |                     |       |    |    |
|---------------------------------|--------|---------------------|-------|----|----|
| HFSR during sorafenib treatment | Yes/No | 0.816 (0.519-1.285) | 0.381 |    |    |
| Sorafenib dose reduction        | Yes/No | 1.289 (0.803-2.068) | 0.293 |    |    |
| Second-line therapy             | Yes/No | 1.278 (0.702-2.326) | 0.422 |    |    |
| BCLC stage                      | C/B    | 1.591 (0.856-2.957) | 0.142 |    |    |
| Portal vein invasion            | Yes/No | 1.512 (0.939-2.435) | 0.089 | NS | NS |
| Vp4                             | Yes/No | 1.822 (1.027-3.232) | 0.040 | NS | NS |
| Extrahepatic metastasis         | Yes/No | 1.067 (0.665-1.712) | 0.788 |    |    |
| High tumor burden               | Yes/No | 1.223 (0.758-1.974) | 0.409 |    |    |
| ALBI grade                      | 2-3/1  | 1.561 (0.983-2.478) | 0.059 | NS | NS |

|                             |           |                         |       |                         |       |
|-----------------------------|-----------|-------------------------|-------|-------------------------|-------|
| AFP (ng/mL)                 | >20/≤20   | 1.448 (0.907-<br>2.311) | 0.120 |                         |       |
| AFP (ng/mL)                 | >400/≤400 | 1.388 (0.884-<br>2.178) | 0.154 |                         |       |
| ALT (U/L)                   | >40/≤40   | 1.327 (0.840-<br>2.096) | 0.225 |                         |       |
| AST (U/L)                   | >40/≤40   | 1.472 (0.931-<br>2.328) | 0.098 | NS                      | NS    |
| Creatinine (mg/dL)          | >1.2/≤1.2 | 0.609 (0.321-<br>1.156) | 0.130 |                         |       |
| <b>On-treatment factors</b> |           |                         |       |                         |       |
| Concurrent LRT              | Yes/No    | 0.804 (0.433-<br>1.493) | 0.489 |                         |       |
| Concurrent ICI              | Yes/No    | 0.724 (0.396-<br>1.323) | 0.294 |                         |       |
| Early AFP reduction         | >10%/≤10% | 0.368 (0.202-<br>0.670) | 0.001 | 0.397 (0.214-<br>0.737) | 0.003 |

|                                   |        |                     |       |                     |        |
|-----------------------------------|--------|---------------------|-------|---------------------|--------|
| HFSR during regorafenib treatment | Yes/No | 0.433 (0.253-0.740) | 0.002 | 0.238 (0.108-0.525) | <0.001 |
| Regorafenib dose reduction        | Yes/No | 0.953 (0.607-1.496) | 0.835 |                     |        |

---

Abbreviations: CI, confidence interval; HR, hazard ratio; NS, not significant; LRT, loco-regional therapy; ICI, immune checkpoint inhibitor; HFSR, hand-foot skin reaction.

†Model I included only baseline factors. Model II included both baseline and on-treatment factors.

**Table S3.** Univariate and multivariate analyses of factors associated with overall survival

|                                                    |                 | Univariate              |       | Multivariate<br>Model I† |   | Multivariate<br>Model II† |   |
|----------------------------------------------------|-----------------|-------------------------|-------|--------------------------|---|---------------------------|---|
|                                                    |                 | HR (95% CI)             | P     | HR (95% CI)              | P | HR (95% CI)               | P |
| <b>Baseline factors</b>                            |                 |                         |       |                          |   |                           |   |
| Age                                                | >60/≤60         | 0.749 (0.426-<br>1.318) | 0.317 |                          |   |                           |   |
| Sex                                                | Male/<br>Female | 0.703 (0.316-<br>1.561) | 0.386 |                          |   |                           |   |
| HBsAg-positive                                     | Yes/No          | 1.023 (0.584-<br>1.790) | 0.937 |                          |   |                           |   |
| Anti-HCV-positive                                  | Yes/No          | 1.515 (0.808-<br>2.840) | 0.195 |                          |   |                           |   |
| Time to progression on prior<br>sorafenib (months) | >4/≤4           | 0.862 (0.497-<br>1.495) | 0.597 |                          |   |                           |   |
| Achieving disease control by<br>sorafenib          | Yes/No          | 1.008 (0.581-<br>1.750) | 0.977 |                          |   |                           |   |

|                         |           |                     |        |                     |        |                     |       |
|-------------------------|-----------|---------------------|--------|---------------------|--------|---------------------|-------|
| Second-line therapy     | Yes/No    | 0.591 (0.315-1.111) | 0.102  |                     |        |                     |       |
| BCLC stage              | C/B       | 2.397 (0.953-6.030) | 0.063  |                     |        |                     |       |
| Portal vein invasion    | Yes/No    | 3.403 (1.960-5.910) | <0.001 | 3.169 (1.817-5.528) | <0.001 |                     | NS    |
| Vp4                     | Yes/No    | 3.005 (1.636-5.521) | <0.001 |                     | NS     | 2.324 (1.063-5.080) | 0.035 |
| Extrahepatic metastasis | Yes/No    | 0.730 (0.417-1.281) | 0.273  |                     |        |                     |       |
| High tumor burden       | Yes/No    | 3.390 (1.945-5.910) | <0.001 |                     | NS     |                     | NS    |
| ALBI grade              | 2-3/1     | 3.144 (1.672-5.910) | <0.001 | 2.758 (1.458-5.216) | 0.002  |                     | NS    |
| AFP (ng/mL)             | >20/≤20   | 1.721 (0.953-3.108) | 0.072  |                     |        |                     |       |
| AFP (ng/mL)             | >400/≤400 | 1.370 (0.793-2.368) | 0.259  |                     |        |                     |       |

|                             |           |                      |       |    |                      |        |
|-----------------------------|-----------|----------------------|-------|----|----------------------|--------|
| ALT (U/L)                   | >40/≤40   | 2.290 (1.318-3.980)  | 0.003 | NS |                      | NS     |
| AST (U/L)                   | >40/≤40   | 2.707 (1.479-4.953)  | 0.001 | NS | 4.210 (1.726-10.266) | 0.002  |
| Creatinine (mg/dL)          | >1.2/≤1.2 | 1.190 (0.596-2.376)  | 0.623 |    |                      |        |
| <b>On-treatment factors</b> |           |                      |       |    |                      |        |
| Concurrent LRT              | Yes/No    | 0.439 (0.158-1.219)  | 0.114 |    |                      |        |
| Concurrent ICI              | Yes/No    | 0.718 (0.350-1.476)  | 0.368 |    |                      |        |
| Early AFP reduction         | >10%/≤10% | 0.482 (0.239-0.973)  | 0.042 |    | 0.450 (0.215-0.940)  | 0.034  |
| Hand-foot skin reaction     | Yes/No    | 0.289 (0.135-0.3615) | 0.001 |    | 0.173 (0.068-0.442)  | <0.001 |

Abbreviations: CI, confidence interval; HR, hazard ratio; NS, not significant; LRT, loco-regional therapy; ICI, immune checkpoint inhibitor; HFSR, hand-foot skin reaction.

†Model I included only baseline factors. Model II included both baseline and on-treatment factors.



**Table S4.** Univariate and multivariate analyses of factors associated with post-progression survival

|                                      |                 | Univariate              |       | Multivariate         |       |
|--------------------------------------|-----------------|-------------------------|-------|----------------------|-------|
|                                      |                 | HR (95% CI)             | P     | HR (95% CI)          | P     |
| Age                                  | >60/≤60         | 0.670 (0.347-1.294)     | 0.233 |                      |       |
| Sex                                  | Male/<br>Female | 0.695 (0.270-1.787)     | 0.450 |                      |       |
| HBsAg-positive                       | Yes/No          | 0.899 (0.457-1.766)     | 0.757 |                      |       |
| Anti-HCV-positive                    | Yes/No          | 1.647 (0.794-3.415)     | 0.180 |                      |       |
| <b>Progression pattern</b>           |                 |                         |       |                      |       |
| Intrahepatic size                    |                 | 0.791 (0.413-1.514)     | 0.478 |                      |       |
| Intrahepatic number                  |                 | 1.107 (0.568-2.157)     | 0.765 |                      |       |
| Extrahepatic size                    |                 | 0.709 (0.369-1.359)     | 0.300 |                      |       |
| Extrahepatic number                  |                 | 1.080 (0.524-2.226)     | 0.835 |                      |       |
| <b>Status at disease progression</b> |                 |                         |       |                      |       |
| BCLC stage                           | C/B             | 24.111 (0.239-2433.341) | 0.176 |                      |       |
| Portal vein invasion                 | Yes/No          | 3.106 (1.598-6.038)     | 0.001 |                      | NS    |
| Vp4                                  | Yes/No          | 2.937 (1.430-6.032)     | 0.003 | 5.102 (1.578-16.949) | 0.007 |

|                         |           |                     |        |                        |        |
|-------------------------|-----------|---------------------|--------|------------------------|--------|
| Extrahepatic metastasis | Yes/No    | 1.094 (0.527-2.272) | 0.809  |                        |        |
| High tumor burden       | Yes/No    | 3.780 (1.955-7.310) | <0.001 | 9.296 (3.379-25.578)   | <0.001 |
| ALBI grade              | 1         | 1                   |        |                        |        |
|                         | 2         | 2.856               | 0.036  | 4.499 (1.541-13.137)   | 0.006  |
|                         | 3         | 13.935              | <0.001 | 26.926 (6.638-109.227) | <0.001 |
| AFP (ng/mL)             | >20/≤20   | 2.977 (1.234-7.277) | 0.015  |                        | NS     |
| AFP (ng/mL)             | >400/≤400 | 1.679 (0.877-3.214) | 0.118  |                        |        |
| ALT (U/L)               | >40/≤40   | 1.795 (0.937-3.442) | 0.078  |                        | NS     |
| AST (U/L)               | >40/≤40   | 2.309 (1.086-4.909) | 0.030  |                        | NS     |
| Creatinine (mg/dL)      | >1.2/≤1.2 | 1.445 (0.653-3.198) | 0.364  |                        |        |
| Next-line therapy       | Yes/No    | 0.339 (0.168-0.684) | 0.003  | 0.369 (0.163-0.838)    | 0.017  |

---

Abbreviations: CI, confidence interval; HR, hazard ratio; NS, not significant.

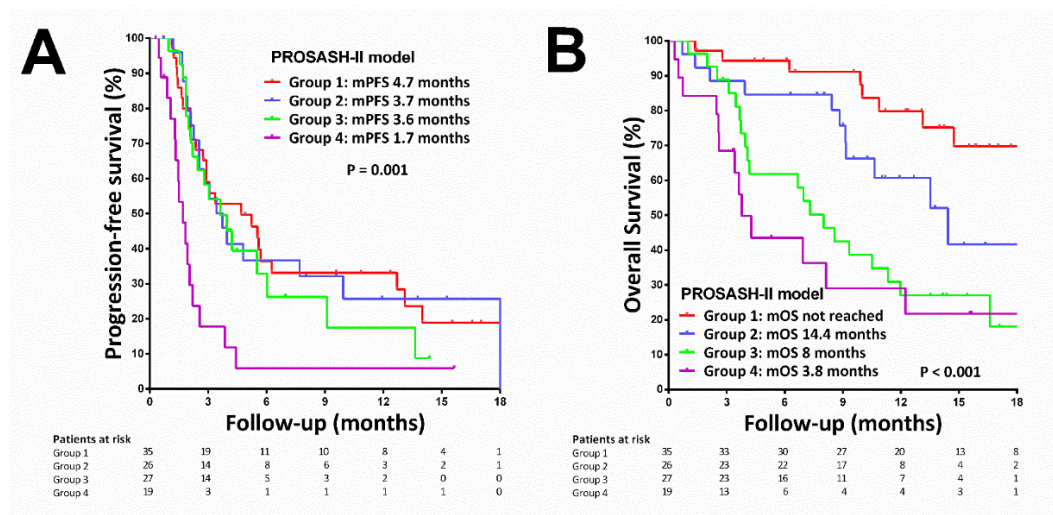

**Figure S1.** Kaplan-Meier curves of progression-free survival (PFS) and overall survival (OS) after regorafenib treatment. (A) RFS stratified by PROSASH-II model. (B) OS stratified by PROSASH-II model.

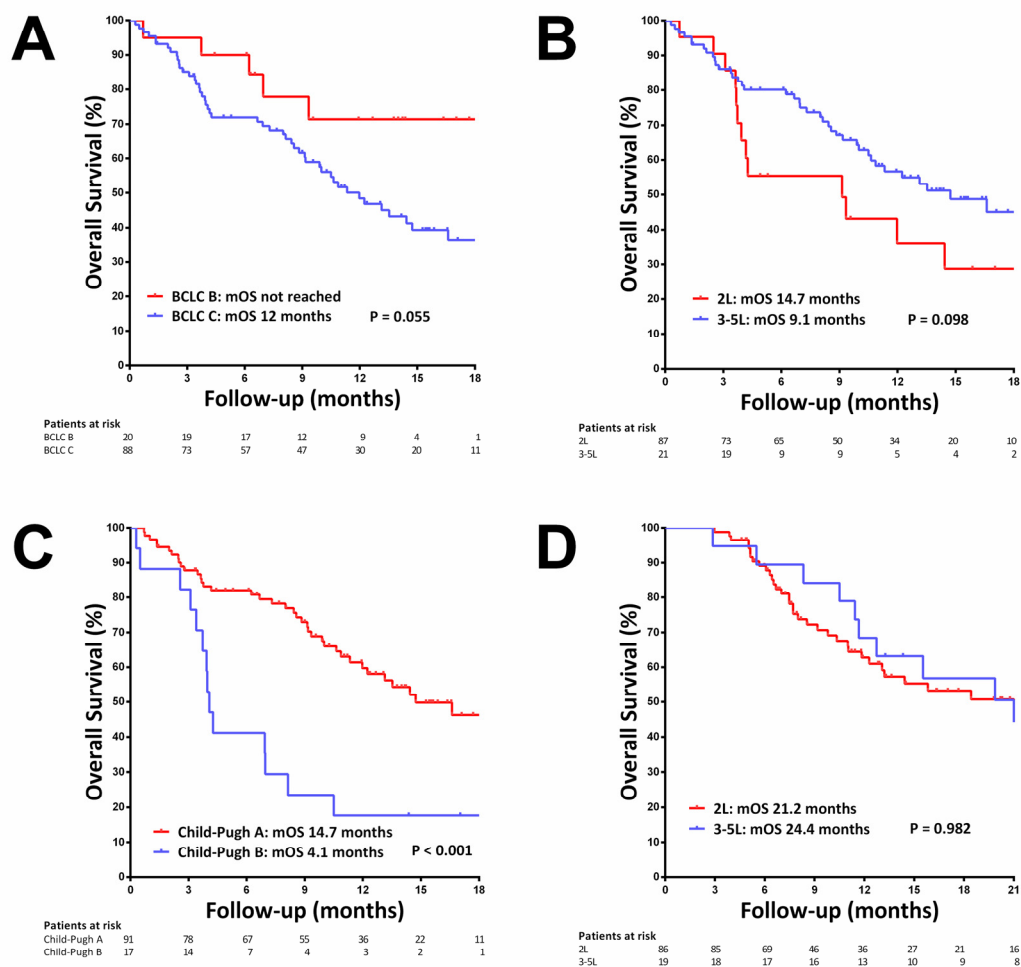

**Figure S2.** Kaplan-Meier curves of overall survival (OS) in HCC patients receiving regorafenib treatment. (A) OS stratified by BCLC stage. (B) OS stratified by lines of therapy. (C) OS stratified by Child-Pugh class. (D) OS from starting sorafenib treatment stratified by lines of therapy.
